# Supplementary material
Source: PubMed Central journal article supplement (PMC3923327)

| Gene Name               | OMIM #  | Associated Disease(s) or Phenotype(s)                                                                                                                                                                                      | Inheritance Pattern                           |
|-------------------------|---------|----------------------------------------------------------------------------------------------------------------------------------------------------------------------------------------------------------------------------|-----------------------------------------------|
| AARS2                   | *612035 | Combined Oxidative Phosphorylation Deficiency 8; Infantile Mitochondrial Cardiomyopathy <sup>159</sup>                                                                                                                     | Autosomal recessive                           |
| ABCB7                   | *300135 | Anemia, Sideroblastic and Spinocerebellar Ataxia <sup>1,2</sup>                                                                                                                                                            | X-linked                                      |
| ACAD9                   | *611103 | Acyl-CoA dehydrogenase 9 deficiency; ACAD9 Deficiency; Mitochondrial complex I deficiency due to ACAD9 Deficiency <sup>3</sup>                                                                                             | Autosomal recessive                           |
| ADCK3 (CABC1; COQ8)     | *606980 | Coenzyme Q10 Deficiency; Spinocerebellar Ataxia, Autosomal Recessive <sup>9,24,25</sup>                                                                                                                                    | Autosomal recessive                           |
| AIFM1                   | *300169 | Combined oxidative phosphorylation deficiency 6; COXPD6; Encephalomyopathy, Mitochondrial, X-Linked <sup>4</sup>                                                                                                           | X-linked                                      |
| ALAS2                   | *301300 | Anemia, Hereditary Sideroblastic, X-linked <sup>1,2</sup> Protoporphyrin, erythropoietic, X-linked dominant.                                                                                                               | X-linked                                      |
| APTX                    | *606350 | Ataxia with Oculomotor Apraxia 1 (AOA1); Cerebellar ataxia with Muscle coenzyme Q10 deficiency <sup>5,6</sup>                                                                                                              | Autosomal recessive                           |
| ATP5E                   | *606153 | Mitochondrial complex V (ATP Synthase) deficiency, Nuclear Type 3; MC5DN3 <sup>7</sup>                                                                                                                                     | Autosomal recessive                           |
| ATPAF2 (ATP12)          | *608918 | Mitochondrial complex V (ATP Synthase) Deficiency, Nuclear Type 1; MC5DN1 <sup>8</sup>                                                                                                                                     | Autosomal recessive                           |
| AUH                     | *600529 | 3-Methylglutaconic Aciduria, Type 1; MGA, Type 1; 3-Methylglutaconyl-CoA Hydratase Deficiency <sup>9</sup>                                                                                                                 | Autosomal recessive                           |
| BCS1L                   | *603647 | Bjornstad syndrome; GRACILE syndrome; Mitochondrial Complex III Deficiency; Leigh Syndrome <sup>10,11,12</sup>                                                                                                             | Autosomal recessive                           |
| C10ORF2 (Twinkle, PEO1) | *606075 | C10orf2-Related Ataxia Neuropathy Spectrum Disorders; Mitochondrial DNA Depletion Syndrome 7, Hepatocerebral Form; Progressive External Ophthalmoplegia with Mitochondrial DNA Deletions <sup>3,14,15,16,17,18,19,20</sup> | Autosomal dominant AND<br>Autosomal recessive |
| C12ORF65                | *613541 | Combined Oxidative Phosphorylation Deficiency 7; COXPD7 <sup>21</sup>                                                                                                                                                      | Autosomal recessive                           |
| C20ORF7                 | *612360 | Mitochondrial Complex 1 Deficiency <sup>22,23</sup>                                                                                                                                                                        | Autosomal recessive                           |
| C8ORF38                 | *612392 | Leigh syndrome due to mitochondrial complex I deficiency <sup>13</sup>                                                                                                                                                     | Autosomal recessive                           |
| CISD2 (WFS2)            | *611507 | Wolfram Syndrome 2 (DIDMOAD: diabetes insipidus, diabetes mellitus, optic atrophy, and deafness) <sup>26,27</sup>                                                                                                          | Autosomal recessive                           |
| COQ2                    | *609825 | Coenzyme Q10 Deficiency; CoQ10 deficiency, Primary <sup>28</sup>                                                                                                                                                           | Autosomal recessive                           |
| COQ9                    | *612837 | Coenzyme Q10 Deficiency; CoQ10 Deficiency, Primary <sup>29</sup>                                                                                                                                                           | Autosomal recessive                           |
| COX10                   | *602125 | Mitochondrial Complex IV Deficiency; Cytochrome c Oxidase Deficiency; Leigh Syndrome <sup>30</sup>                                                                                                                         | Autosomal recessive                           |
| COX15                   | *603646 | Mitochondrial Complex IV Deficiency; Cytochrome c Oxidase Deficiency <sup>31</sup>                                                                                                                                         | Autosomal recessive                           |
| COX6B1                  | *124089 | Mitochondrial Complex IV Deficiency; Cytochrome c Oxidase Deficiency <sup>32</sup>                                                                                                                                         | Autosomal recessive                           |
| DARS2                   | *610956 | Leukoencephalopathy with Brain Stem and Spinal Cord Involvement and Lactate Elevation <sup>33</sup>                                                                                                                        | Autosomal recessive                           |
| DGUOK                   | *601465 | Mitochondrial DNA Depletion Syndrome 3 (hepatocerebral type) <sup>34,35,36</sup>                                                                                                                                           | Autosomal recessive                           |

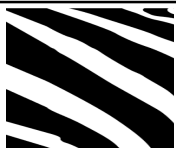

| Gene Name   | OMIM #  | Associated Disease(s) or Phenotype(s)                                                                                                                                                                           | Inheritance Pattern                        |
|-------------|---------|-----------------------------------------------------------------------------------------------------------------------------------------------------------------------------------------------------------------|--------------------------------------------|
| DLAT        | *608770 | Pyruvate dehydrogenase E2 Deficiency; Leigh syndrome; Lactic Acidemia due to defect of E2 lipoyl transacetylase of the pyruvate dehydrogenase complex <sup>37</sup>                                             | Autosomal recessive                        |
| DLD         | *238331 | E3 deficiency (Maple syrup urine disease, type III); Leigh syndrome <sup>38</sup>                                                                                                                               | Autosomal recessive                        |
| DNAJC19     | *608977 | 3-methylglutaconic aciduria, type V ; dilated cardiomyopathy and ataxia <sup>39</sup>                                                                                                                           | Autosomal recessive                        |
| DNM1L       | +603850 | Lethal Encephalopathy due to Defective Mitochondrial Fission <sup>40</sup>                                                                                                                                      | Autosomal dominant                         |
| ETFA        | *608053 | Multiple acyl-CoA dehydrogenation deficiency; Glutaricaciduria, type IIA <sup>160,161,162</sup>                                                                                                                 | Autosomal recessive                        |
| ETFB        | *130410 | Multiple acyl-CoA dehydrogenation deficiency; Glutaricaciduria, type IIB <sup>160,161,162</sup>                                                                                                                 | Autosomal recessive                        |
| ETFDH       | *231675 | Multiple acyl-CoA Dehydrogenation Deficiency; Glutaricaciduria, Type IIC <sup>160,161,162</sup>                                                                                                                 | Autosomal recessive                        |
| ETHE1       | *608451 | Ethylmalonic encephalopathy <sup>163,164,165</sup>                                                                                                                                                              | Autosomal recessive                        |
| FASTKD2     | *612322 | Mitochondrial Complex IV Deficiency <sup>41</sup>                                                                                                                                                               | Autosomal recessive                        |
| FBP1        | *611570 | Fructose-1,6-Bisphosphatase Deficiency; Lactic acidosis <sup>166</sup>                                                                                                                                          | Autosomal recessive                        |
| FH          | *136850 | Fumarate Hydratase Deficiency; Fumaric Aciduria; Fumarase Deficiency <sup>42,43</sup> Leiomyomatosis and renal cell cancer; Multiple cutaneous and uterine leiomyomata                                          | Autosomal recessive;<br>Autosomal dominant |
| FOXRED1     | *613622 | Leigh syndrome due to mitochondrial complex I deficiency <sup>44</sup>                                                                                                                                          | Autosomal recessive                        |
| G6PC        | *613742 | Glycogen Storage Disease Ia; Lactic acidosis <sup>169</sup>                                                                                                                                                     | Autosomal recessive                        |
| GFER        | *600924 | Myopathy, Mitochondrial Progressive, with Congenital Cataract, Hearing Loss and Developmental Delay <sup>45</sup>                                                                                               | Autosomal recessive                        |
| GFM1 (EFG1) | *606639 | Combined Oxidative Phosphorylation Deficiency 1; COXPD1; Hepatoencephalopathy, Early Fatal Progressive <sup>46,47,48</sup>                                                                                      | Autosomal recessive                        |
| GYS2        | *138571 | Glycogen Storage Disease, Type 0, Liver ; Lactic acidosis <sup>166,167,168</sup>                                                                                                                                | Autosomal recessive                        |
| ISCU        | *611911 | Myopathy with Deficiency of ISCU; Iron-Sulfur Cluster Deficiency Myopathy; Myopathy with Deficiency of Succinate Dehydrogenase and Aconitase; Myopathy with Exercise Intolerance, Swedish Type <sup>49,50</sup> | Autosomal recessive                        |
| LRPPRC      | *607544 | Complex IV deficiency; Leigh syndrome, French-Canadian Type <sup>51</sup>                                                                                                                                       | Autosomal recessive                        |
| MPV17       | *137960 | Mitochondrial DNA Depletion Syndrome 6 (Hepatocerebral type) <sup>34</sup>                                                                                                                                      | Autosomal recessive                        |
| MRPS16      | *609204 | Combined Oxidative Phosphorylation Deficiency 2; COXPD2; Agenesis of Corpus Callosum with Dysmorphism and Fatal Lactic Acidosis <sup>55</sup>                                                                   | Autosomal recessive                        |
| MRPS22      | *605810 | Combined Oxidative Phosphorylation Deficiency 5; COXPD5 <sup>56</sup>                                                                                                                                           | Autosomal recessive                        |
| NDUFA1      | *300078 | Mitochondrial Complex I Deficiency; NADH-Coenzyme Q Reductase Deficiency <sup>57,58,59</sup>                                                                                                                    | X-linked                                   |
| NDUFA10     | *603835 | Leigh Syndrome due to Mitochondrial Complex I Deficiency <sup>61</sup>                                                                                                                                          | Autosomal recessive                        |



| Gene Name         | OMIM #  | Associated Disease(s) or Phenotype(s)                                                                                                                                                    | Inheritance Pattern                                   |
|-------------------|---------|------------------------------------------------------------------------------------------------------------------------------------------------------------------------------------------|-------------------------------------------------------|
| NDUFA11           | *612638 | Mitochondrial complex I deficiency presented with encephalocardiomyopathy or fatal infantile lactic acidemia <sup>62</sup>                                                               | Autosomal recessive                                   |
| NDUFA2            | *602137 | Leigh syndrome due to mitochondrial complex I deficiency <sup>60</sup>                                                                                                                   | Autosomal recessive                                   |
| NDUFAF1           | *606934 | Mitochondrial complex I deficiency and cardioencephalomyopathy <sup>63,64</sup>                                                                                                          | Autosomal recessive                                   |
| NDUFAF2           | *609653 | Mitochondrial Complex I Deficiency; Leigh Syndrome <sup>65,66,67</sup>                                                                                                                   | Autosomal recessive                                   |
| NDUFAF3 (C3ORF60) | *612911 | Mitochondrial Complex I Deficiency <sup>68</sup>                                                                                                                                         | Autosomal recessive                                   |
| NDUFAF4 (C6ORF66) | *611776 | Mitochondrial Complex I Deficiency <sup>68</sup>                                                                                                                                         | Autosomal recessive                                   |
| NDUFS1            | *157655 | Mitochondrial Complex I Deficiency <sup>69,70,71,72,73,74</sup><br>Leigh syndrome or Leigh-like syndrome                                                                                 | Autosomal recessive                                   |
| NDUFS2            | *602985 | Mitochondrial Complex I Deficiency <sup>70,75</sup>                                                                                                                                      | Autosomal recessive likely <sup>a</sup>               |
| NDUFS3            | *603846 | Leigh Syndrome; Leigh Syndrome due to Mitochondrial Complex I Deficiency <sup>73,74</sup>                                                                                                | Autosomal recessive likely <sup>a</sup>               |
| NDUFS4            | *602694 | Mitochondrial complex I deficiency; Leigh Syndrome <sup>76,77,78,79,80</sup>                                                                                                             | Autosomal recessive                                   |
| NDUFS6            | *603848 | Mitochondrial complex I deficiency and fatal neonatal lactic acidemia <sup>81,82</sup>                                                                                                   | Autosomal recessive                                   |
| NDUFS7            | *601825 | Leigh Syndrome due to Mitochondrial Complex I Deficiency <sup>83,84,85</sup>                                                                                                             | Autosomal recessive likely <sup>a</sup>               |
| NDUFS8            | *602141 | Leigh Syndrome due to Mitochondrial Complex I Deficiency <sup>70,72,86,87</sup>                                                                                                          | Autosomal recessive likely <sup>a</sup>               |
| NDUFV1            | *161015 | Alexander Disease; Leigh Syndrome; Mitochondrial Complex I Deficiency <sup>70,71,72,73,74,88</sup>                                                                                       | Autosomal recessive                                   |
| NDUFV2            | *600532 | Mitochondrial Complex I Deficiency. Possible association with Parkinson Disease <sup>72,73,89,90</sup>                                                                                   | Autosomal recessive with exception <sup>b</sup>       |
| NUBPL             | *613621 | Mitochondrial complex I deficiency with mitochondrial encephalomyopathy <sup>44</sup>                                                                                                    | Autosomal recessive                                   |
| OPA1              | *605290 | Optic Atrophy I; Optic Atrophy with or without deafness, ophthalmoplegia, myopathy, ataxia and neuropathy <sup>91,92</sup>                                                               | Autosomal dominant; Semi-dominant                     |
| OPA3              | *606580 | 3-Methylglutaconic Aciduria, Type 3; Costeff Syndrome; Optic Atrophy Plus Syndrome <sup>93,94</sup>                                                                                      | Autosomal recessive; Optic Atrophy Autosomal dominant |
| PC                | *608786 | Pyruvate carboxylase deficiency; Leigh syndrome <sup>97,98</sup>                                                                                                                         | Autosomal recessive                                   |
| PDHA1             | *300502 | Pyruvate Dehydrogenase E1-alpha Deficiency; Leigh Syndrome, X-linked <sup>99</sup>                                                                                                       | X-linked                                              |
| PDHB              | *179060 | Pyruvate dehydrogenase (E1-beta) deficiency; Lactic acidosis and neurologic dysfunction <sup>100</sup>                                                                                   | Autosomal recessive                                   |
| PDHX              | *608769 | Pyruvate Dehydrogenase E-3 Binding Protein (Component X) Deficiency; Lactic Acidemia due to Defect in Lipoyl-Containing Component X of the Pyruvate Dehydrogenase Complex <sup>101</sup> | Autosomal recessive                                   |
| PDP1              | *605993 | Pyruvate dehydrogenase phosphatase deficiency; lactic acidosis resulting in acute respiratory distress and early death <sup>102,103</sup>                                                | Autosomal recessive                                   |
| PDSS1             | *607429 | Coenzyme Q10 Deficiency; CoQ10 deficiency, Primary <sup>104</sup>                                                                                                                        | Autosomal recessive                                   |



| Gene Name      | OMIM #  | Associated Disease(s) or Phenotype(s)                                                                                                                                                                                                                | Inheritance Pattern                                 |
|----------------|---------|------------------------------------------------------------------------------------------------------------------------------------------------------------------------------------------------------------------------------------------------------|-----------------------------------------------------|
| PDSS2          | *610564 | Coenzyme Q10 Deficiency; CoQ10 Deficiency, Primary <sup>105</sup>                                                                                                                                                                                    | Autosomal recessive                                 |
| POLG (POLG1)   | *174763 | Mitochondrial DNA Depletion Syndrome (types 4A [Alpers type] and 4B [MNGIE type]); Mitochondrial Recessive Ataxia Syndrome (SANDO and SCAE); Progressive External Ophthalmoplegia, Autosomal Recessive AND Autosomal Dominant <sup>107,108,109</sup> | Autosomal dominant AND Autosomal recessive          |
| POLG2          | *604983 | Progressive External Ophthalmoplegia (PEO) with Mitochondrial DNA Deletions, Autosomal Dominant <sup>110,111</sup>                                                                                                                                   | Autosomal dominant                                  |
| PUS1           | *608109 | Myopathy, Lactic Acidosis and Sideroblastic Anemia 1 <sup>113,114</sup>                                                                                                                                                                              | Autosomal recessive                                 |
| RARS2          | *611524 | Pontocerebellar Hypoplasia Type 6; PCH6 <sup>115</sup>                                                                                                                                                                                               | Autosomal recessive                                 |
| RRM2B          | *604712 | Mitochondrial DNA Depletion Syndrome (types 8A and 8B); Progressive External Ophthalmoplegia (PEO) with Mitochondrial DNA Deletions, Autosomal Dominant, 5 <sup>116,117,118</sup>                                                                    | Autosomal dominant AND Autosomal recessive          |
| SARS2 (FBXO17) | *612804 | Hyperuricemia, Pulmonary Hypertention, Renal Failure, and Alkalosis; HUPRA Syndrome <sup>119</sup>                                                                                                                                                   | Autosomal recessive                                 |
| SCO1           | *603644 | Cytochrome Oxidase-Deficiency, Hepatic Failure and Encephalopathy <sup>120</sup>                                                                                                                                                                     | Autosomal recessive                                 |
| SCO2           | *604272 | Cytochrome Oxidase Deficiency and Early Onset, Fatal Hypertrophic Cardiomyopathy (HCM) <sup>121,122</sup>                                                                                                                                            | Autosomal recessive                                 |
| SDHAF1         | *612848 | Mitochondrial Complex II Deficiency; Succinate Dehydrogenase Complex Assembly Factor 1 Deficiency <sup>124</sup>                                                                                                                                     | Autosomal recessive                                 |
| SLC25A3 (PHC)  | *600370 | Mitochondrial Phosphate Carrier Deficiency <sup>125</sup>                                                                                                                                                                                            | Autosomal recessive                                 |
| SLC25A4 (ANT1) | *103220 | Progressive External Ophthalmoplegia (PEO) with Mitochondrial DNA Deletions 3; Cardiomyopathy, Familial Hypertrophic (CMH) <sup>18,20</sup>                                                                                                          | Autosomal dominant (PEO); Autosomal recessive (CMH) |
| SPG7           | *602783 | Spastic Paraplegia 7; Hereditary Spastic Paraplegia, Paraplegin Type <sup>128</sup>                                                                                                                                                                  | Autosomal recessive                                 |
| SUCLA2         | *603921 | Mitochondrial DNA Depletion Syndrome 5 (encephalomyopathic type with methylmalonic aciduria) <sup>129</sup>                                                                                                                                          | Autosomal recessive                                 |
| SUCLG1         | *611224 | Mitochondrial DNA Depletion Syndrome 9 (encephalomyopathic type with methylmalonic aciduria) <sup>130,131,132</sup>                                                                                                                                  | Autosomal recessive                                 |
| SURF1          | *185620 | Leigh Syndrome due to Mitochondrial Complex IV Deficiency <sup>133,134,135,136</sup>                                                                                                                                                                 | Autosomal recessive                                 |
| TACO1          | *612958 | Leigh Syndrome due to Mitochondrial Complex IV Deficiency <sup>137</sup>                                                                                                                                                                             | Autosomal recessive                                 |
| TAZ            | *300394 | Barth syndrome; 3-Methylglutaconic Aciduria Type II; TAZ-related dilated cardiomyopathy <sup>138,139</sup>                                                                                                                                           | X-linked                                            |
| TIMM8A (DDP1)  | *300356 | Mohr-Tranebjaerg Syndrome (Deafness-Dystonia-Optic Atrophy Syndrome [DDON]); Jensen Syndrome (Opticoacoustic Nerve Atrophy with Dementia) <sup>140</sup>                                                                                             | X-linked                                            |
| TK2            | *188250 | Mitochondrial DNA Depletion Syndrome 2 (myopathic type) <sup>151,142,143,144</sup>                                                                                                                                                                   | Autosomal recessive                                 |
| TMEM126A       | *612988 | Optic Atrophy 7; Nonsyndromic autosomal recessive optic atrophy <sup>146</sup>                                                                                                                                                                       | Autosomal recessive                                 |
| TMEM70         | *612418 | Mitochondrial Complex V (ATP Synthase) Deficiency, Nuclear Type 2; Encephalocardiomyopathy, Mitochondrial, Neonatal, Due to ATP Synthase Deficiency <sup>145</sup>                                                                                   | Autosomal recessive                                 |
| TRMU           | *610230 | Liver Failure, Acute Infantile <sup>147</sup>                                                                                                                                                                                                        | Autosomal recessive                                 |



| Gene Name        | OMIM #  | Associated Disease(s) or Phenotype(s)                                                                                                                                                                                                       | Inheritance Pattern                           |
|------------------|---------|---------------------------------------------------------------------------------------------------------------------------------------------------------------------------------------------------------------------------------------------|-----------------------------------------------|
| TSFM             | *604723 | Combined Oxidative Phosphorylation Deficiency 3 <sup>148</sup>                                                                                                                                                                              | Autosomal recessive                           |
| TTC19            | *613814 | Mitochondrial Complex III Deficiency <sup>149</sup>                                                                                                                                                                                         | Autosomal recessive                           |
| TUFM             | *602389 | Combined Oxidative Phosphorylation Deficiency 4 <sup>150</sup>                                                                                                                                                                              | Autosomal recessive                           |
| TYMP (ECGF1, TP) | *131222 | Mitochondrial DNA Depletion Syndrome 1 (MNGIE Type) <sup>151,152,153</sup>                                                                                                                                                                  | Autosomal recessive                           |
| UQCRB            | *191330 | Mitochondrial Complex III Deficiency, UQCRB-Related <sup>155</sup>                                                                                                                                                                          | Autosomal recessive                           |
| UQCRQ            | *612080 | Mitochondrial Complex III Deficiency, UQCRQ-Related <sup>155</sup>                                                                                                                                                                          | Autosomal recessive                           |
| WFS1             | *606201 | WFS1-Related Disorders; Wolfram Syndrome (DIDMOAD: diabetes insipidus, diabetes mellitus, optic atrophy, and deafness); Wolfram Syndrome-Like Disease; DFNA6/14/38 Nonsyndromic Low-Frequency Sensorineural Hearing Loss <sup>156,157</sup> | Autosomal recessive AND<br>Autosomal dominant |
| YARS2            | *610957 | Myopathy, Lactic Acidosis and Sideroblastic Anemia 2 <sup>158</sup>                                                                                                                                                                         | Autosomal recessive                           |

<sup>a</sup> While autosomal recessive inheritance is most likely, these case reports should be noted. See references as indicated for each gene for additional information:

NDUFS2: Single NDUFS2 mutation identified in affected individual who also harbored a single NDUFA8 mutation<sup>70</sup>

NDUFS3: Single NDUFS3 missense mutation identified in individual affected with Complex I Deficiency<sup>73</sup>

NDUFS7: Single heterozygous NDUFS7 mutation identified in individual affected with Complex I Deficiency<sup>70</sup>

NDUFS8: 2 affected individuals identified with single NDUFA8 mutation; one of these individuals also harbored single NDUFS2 mutation<sup>70,72</sup>

<sup>b</sup> Heterozygous missense change p.A29V in NDUFV2 has been associated with Parkinson Disease<sup>90</sup>



**References:** 1. Camaschella (2008) *Br J Haem* 143:27-38. 2. Bergmann et al., (2010) *Ped Blood Ca* 54:273-278. 3. He et al., (2007) *Am J Hum Genet* 81:87-103. 4. Ghezzi et al., (2010) *Am J Hum Genet* 86:639-649. 5. Onodera (2006) *Neuropath* 26:361-367. 6. Castellotti et al., (2011, Apr 5) *Neurogen* [Epub ahead of print]. 7. Mayr et al., (2010) *Hum Mol Genet* 19:3430-3439. 8. De Meirleir et al., (2004) *J Med Genet* 41:120-124. 9. Wortmann et al., (2010) *Neurology* 75:1079-1083. 10. de Lonlay et al., (2001) *Nat Genet* 29:57-60. 11. Hinson et al., (2007) *N Engl J Med* 356:809-19. 12. Visapaa et al., (2002) *Am J Hum Genet* 71:863-876. 13. Pagliarini et al., (2008) *Cell* 134:112-123. 14. Hudson et al., (2005) *Neurology* 64:371-3. 15. Nikali et al., (2005) *Hum Mol Genet* 14:2981-2990. 16. Hakonen et al., (2007) *Brain* 130:3032-40. 17. Sarzi et al., (2007) *Ann Neurol* 62:579-87. 18. Agostino et al., (2003) *Neurology* 60:1354-1356. 19. Lewis, et al., (2002) *J Neurol Sci* 201:39-44. 20. Virgilio et al., (2008) *J Neurol* 255:1384-1391. 21. Antonicka et al., (2010) *Am J Hum Genet* 87:115-122. 22. Sugiana et al., (2008) *Am J Hum Genet* 83:468-478. 23. Gerards et al., (2009) *J Med Genet* [Epub ahead of print]. 24. Mollet et al., (2008) *Am J Hum Genet* 82:623-630. 25. Lagier-Tourenne et al., (2008) *Am J Hum Genet* 82:661-672. 26. Chaussenot et al., (2011) *Ann Neurol* 69:501-508. 27. Amr et al., (2007) *Am J Hum Genet* 81:673-683. 28. Quinzii et al., (2008) *Biofactors* 32(1-4):113-118. 29. Duncan et al., (2009) *Am J Hum Genet* 84:558-566. 30. Coenen et al., (2004) *Ann Neurol* 56:560-564. 31. Antonicka et al., (2003) *Am J Hum Genet* 72:101-114. 32. Massa et al., (2008) *Am J Hum Genet* 82:1281-1289. 33. Isohanni et al., (2010) *J Med Genet* 47:66-70. 34. Sarzi et al., (2007) *J Pediatrics* 105:531-4. 35. Slama et al., (2005) *Mol Genet Metab* 86:462-465. 36. Freisinger et al., (2006) *Arch Neurol* 63:1129-1134. 37. Head et al., (2005) *Ann Neurol* 58:234-241. 38. Shaag et al., (1999) *Am J Med Genet* 82:177-182. 39. Davey et al., (2006) *J Med Genet* 43:385-393. 40. Waterham et al., (2007) *N Eng J Med* 356:1736-1741. 41. Ghezzi et al., (2008) *Am J Hum Genet* 83:415-423. 42. Ottolenghi et al., (2011) *Hum Mut* 32(0):1-7. 43. Bayley et al., (2008) *BMC Med Genet* 9:20. 44. Calvo et al., (2010) *Nat Genet* 42:851-858. 45. Di Fonzo et al., (2009) *Am J Hum Genet* 84:594-604. 46. Valente et al., (2007) *Am J Hum Genet* 80:44-58. 47. Coenen et al., (2004) *N Engl J Med* 351:2080-6. 48. Antonicka et al., (2006) *Hum Mol Genet* 15:1835-1846. 49. Kollberg et al., (2009) *Brain* 132:2170-2179. 50. Olsson et al., (2008) *Hum Mol Genet* 17(11):1666-1672. 51. Debray et al., (2011) *J Med Genet* 48:183-189. 52. Miller et al., (2004) *Ann Neurol* 56:734-738. 53. Saada et al., (2007) *J Med Genet* 44:784-786. 54. Potluri et al., (2009) *Mol Genet Metab* 96:189-195. 55. Fernandez-Moreira et al., (2007) *Ann Neurol* 61:73-83. 56. Loeffen et al., (1998) *J Inher Metab Dis* 21:210-215. 57. Saskia et al., (2008) *Am J Hum Genet* 82:1306-1315. 58. Hoefs et al., (2011) *Eur J Hum Genet* 19(3):270-274. 59. Berger et al., (2008) *Ann Neurol* 63:405-408. 60. Dunning et al., (2007) *The EMBO Journal* 26:3227-3237. 61. Janssen et al., (2002) *Hum Genet* 110:264-270. 62. Ogilvie et al., (2005) *J Clin Invest* 115:2784-2792. 63. Hoefs et al., (2009) *Hum Mutat* 30:E728-E736. 64. Barghuti et al., (2008) *Mol Genet Metab* 94:78-82. 65. Saada et al., (2009) *Am J Hum Genet* 84:718-727. 66. Hoefs et al., (2010) *Mol Genet Metab* 100:251-6. 67. Bugiani et al., (2004) *Biochimica et Biophysica Acta* 1659:136-147. 68. Benit et al., (2001) *Am J Hum Genet* 68:1344-1352. 69. Hinttala et al., (2005) *J Mol Med* 83:786-794. 70. Pagniez-Mammeri et al., (2009) *Mol Genet Metab* 96:196-200. 71. Benit et al., (2004) *J Med Genet* 41:14-17. 72. Loeffen et al., (2001) *Ann Neurol* 49:195-201. 73. Petruzzella et al., (2001) *Hum Mol Genet* 10:529-535. 74. Budde et al., (2000) *Biochem Biophys Res Commun* 275:63-68. 75. Leshinsky-Silver et al., (2009) *Mol Genet Metab* 97:185-189. 76. Benit et al., (2003) *Hum Genet* 112:563-566. 77. van den Heuvel et al., (1998) *Am J Hum Genet* 62:262-268. 78. Spiegel et al., (2009) *Eur J Hum Genet* 17:1200-1203. 79. Kirby et al., (2004) *J Clin Invest* 114:837-845. 80. Lebon et al., (2007) *Mol Genet Metab* 92:104-108. 81. Lebon et al., (2007) *Mol Genet Metab* 90:379-382. 82. Triepels et al., (1999) *Ann Neurol* 45:787-790. 83. Procaccio, V. and Wallace, D. (2004) *Neurology* 62:1899. 84. Loeffen et al., (1998) *Am J Hum Genet* 63:1598-1608. 85. Schuelke et al., (1999) *Nat Genet* 21:260-261. 86. Benit et al., (2003) *Hum Mutat* 21:582-586. 87. Hattori et al., (1998) *Genomics* 49:52-58. 88. Ferre et al., (2009) *Hum Mutat* 30:E692-705. 89. Stewart et al., (2008) *Neurology* 71:1829-1831. 90. Yu-Wai-Man et al., (2011) *Ophthal* 118(3):558-563. 91. Wortmann et al., (2010) *J Inher Metab Dis* [Pub online Sept.30 2010]. 92. Marin-Valencia et al., (2010) *Mol Genet Metab* 101(1):9-17. 93. Monnot et al., (2009) *Hum Mut* 30(5):734-740. 94. Brown et al., (2006) *Dev Med Child Neurol* 48:756-60. 95. Okajima et al., (2008) *Mol Genet Metab* 93(4):371-380. 96. Barnerias et al., (2010) *Dev Med & Child Neurol* 52:e1-e9. 97. Cameron et al., (2009) *Hum Genet* 125(3):319-326. 98. Maj et al., (2005) *J Clin Endocrinol Metab* 90(7):4101-4107. 99. Mollet et al., (2007) *J Clin Invest* 117:765-772. 100. Lopez et al., (2006) *Am J Hum Genet* 79:1125-1129. 101. Horvath et al., (2006) *Brain* 129:1674-1684. 102. Wong et al., (2008) *Hum Mutat* 29:E150-E172. 103. Blok et al., (2009, Jul 2) *J Med Genet* [Epub ahead of print]. 104. Longley et al., (2006) *Am J Hum Genet* 78:1026-1034. 105. Czernin et al., (2010) *J Neurol* [Epub ahead of print]. 106. Bergmann et al., (2010) *Pediatr Blood Cancer* 54:273-278. 107. Fernandez-Vizarrá et al., (2007) *J Med Genet* 44:173-180. 108. Namavar et al., (2011) *Brain* 134:143-156. 109. Tynnismaa et al., (2009) *Am J Hum Genet* 85(2):290-295. 110. Kollberg et al., (2009) *Neuromuscul Disord* 19:147-150. 111. Bornstein et al., (2008) *Neuromuscul Disord* 18:453-459. 112. Belostotsky et al., (2011) *Am J Hum Genet* 88(2):193-200. 113. Valnot et al., (2000) *Am J Hum Genet* 67:1104-1109. 114. Sacconi et al., (2003) *Pediatr Res* 53:224-230. 115. Jaksch et al., (2000) *Hum Mol Genet* 9:795-801. 116. Ghezzi et al., (2009) *Nat Genet* 41:654-656. 117. Mayr et al., (2007) *Am J Hum Genet* 80:478-484. 118. Arnoldi et al., (2008) *Hum Mutat* 29(4):522-531. 119. Ostergaard et al., (2007) *Brain* 130:853-861. 120. Valayannopoulos et al., (2010) *Mitochondrion* 10:335-341. 121. Rivera et al., (2010) *Mitochondrion* 10:362-368. 122. Ostergaard et al., (2007) *Am J Hum Genet* 81:383-387. 123. Shoubridge, E. (2001) *Hum Mol Genet* 10:2277-2284. 124. von Kleist-Retzow et al., (1999) *Biochim Biophys Acta* 1455:35-44. 125. Pequignot et al., (2001) *J Biol Chem* 276:15326-15329. 126. Ogawa et al., (2002) *Pediatr Neurol* 26:196-200. 127. Weraarpachai et al., (2009) *Nat Genet* 41:833-837. 128. Johnston et al., (1997) *Am J Hum Genet* 61:1053-1058. 129. Wortmann et al., (2010) *J Inher Metab Dis* [Pub online Sept 30 2010]. 130. Tranebjaerg, L. *Gene Reviews* (2009) Deafness-Dystonia-Optic Neuronopathy Syndrome. 131. Oskoui et al., (2006) *Arch Neurol* 63: 1122-1126. 132. Blakely et al., (2008) *Neuromuscul Disord* 18:557-560. 133. Mancuso et al., (2002) *Neurology* 59:1197-1202. 134. Carozzo et al., (2003) *Hum Mutat* 21:453-4. 135. Cizkova et al., (2008) *Nat Genet* 40:1288-1290. 136. Hanein et al., (2009) *Am J Hum Genet* 84:493-498. 137. Schara et al., (2011) *J Inher Metab Dis* 34:197-201. 138. Smeitink et al., (2006) *Am J Hum Genet* 79:869-877. 139. Ghezzi et al., (2011) *Nat Genet* 43(3):259-263. 140. Valente et al., (2007) *Am J Hum Genet* 80:44-58. 141. Hirano et al., (2004) *Neurologist* 10:8-17. 142. Nishino et al., (1999) *Science* 283:689-92. 143. Slama et al., (2005) *Molec Genet Metab* 84:326-331. 144. Barel et al., (2008) *Am J Hum Genet* 82:1211-1216. 145. Rigoli et al., (2011) *Clin Genet* 79(2):103-117. 146. Cryns et al., (2003) *Hum Mutat* 22:275-287. 147. Riley et al., (2010) *Am J Hum Genet* 87:52-59. 148. Tynnismaa et al., (2011) *Am J Hum Genet* 88(5):635-642. 149. Schiff, M, et al. (2006) *Mol Genet Metab* 88(2):153-158. 150. Gordon, N. (2006) *Brain Dev* 28(3):136-140. 151. Olsen, RKJ, et al (2003) *Hum Mutat* 22:12-23. 152. Tiranti et al., (2009) *Nature Med* 15:200-205. 153. Tiranti et al., (2006) *J Med Genet* 43:340-346. 154. Minerì et al., (2008) *J Med Genet* 45:473-478. 155. Hjalmarsen et al., (2010) *J Inher Metab Dis* [Epub ahead of print]. 156. Spiegel et al., (2007) *J Pediatr Endocrinol Metab* 20(12):1339-1342. 157. Soggia et al., (2010) *BMC Med Genet* 11(3)1-5. 158. Chou and Mansfield (2008) *Hum Mutat* 29(7):921-930.



Supplement: NIHMS467756-supplement-Supplemental_File_1.pdf [file NIHMS467756-supplement-Supplemental_File_1.pdf]
